# Supplementary material for: Thymosin beta 10 is a key regulator of tumorigenesis and metastasis and a novel serum marker in breast cancer
Source: Springer Nature journal article supplement (doi:10.1186/s13058-016-0785-2), 2017-02-08
Supplement: MOESM1 [file 12053010]

**Table S1. The clinicopathological characteristics of 253 patients with breast cancer for IHC analysis were presented.**

| Parameters                                             |                | Number of cases | Percentage (%) |
|--------------------------------------------------------|----------------|-----------------|----------------|
| Gender                                                 | Female         | 253             | 100.0          |
| Age (years)                                            | ≤50            | 114             | 45.1           |
|                                                        | >50            | 139             | 54.9           |
| Pathological type                                      | IDC            | 224             | 88.5           |
|                                                        | Other          | 29              | 11.5           |
| T classification                                       | T <sub>1</sub> | 110             | 43.5           |
|                                                        | T <sub>2</sub> | 108             | 42.7           |
|                                                        | T <sub>3</sub> | 32              | 12.6           |
|                                                        | T <sub>4</sub> | 3               | 1.2            |
| N classification                                       | N <sub>0</sub> | 132             | 52.2           |
|                                                        | N <sub>1</sub> | 95              | 37.5           |
|                                                        | N <sub>2</sub> | 21              | 8.3            |
|                                                        | N <sub>3</sub> | 5               | 2.0            |
| M classification                                       | M <sub>0</sub> | 246             | 97.2           |
|                                                        | M <sub>1</sub> | 7               | 2.8            |
| Clinical stage                                         | I              | 105             | 41.5           |
|                                                        | II             | 91              | 36.0           |
|                                                        | III            | 50              | 19.8           |
|                                                        | IV             | 7               | 2.8            |
| Pathological grade                                     | G <sub>1</sub> | 84              | 33.2           |
|                                                        | G <sub>2</sub> | 90              | 35.6           |
|                                                        | G <sub>3</sub> | 79              | 31.2           |
| Survival status                                        | Live           | 150             | 59.3           |
|                                                        | Dead           | 103             | 40.7           |
| Distant metastasis status<br>(Exclude M <sub>1</sub> ) | Negative       | 130             | 52.8           |
|                                                        | Positive       | 116             | 47.2           |

|                      |          |     |      |
|----------------------|----------|-----|------|
| IHC status of TMSB10 | Low      | 99  | 39.1 |
|                      | High     | 154 | 60.9 |
| IHC status of ER     | Negative | 121 | 47.8 |
|                      | Positive | 132 | 52.2 |
| IHC status of PR     | Negative | 89  | 35.2 |
|                      | Positive | 164 | 64.8 |
| IHC status of HER2   | Negative | 182 | 71.9 |
|                      | Positive | 71  | 28.1 |
| IHC status of Ki67   | Low      | 150 | 59.3 |
|                      | High     | 103 | 40.7 |

**Abbreviation:** Invasive ductal carcinoma (IDC), Immunological Histological Chemistry (IHC), Estrogen receptor (ER), Progesterone receptor (PR).
