# Supplementary material for: Thymosin beta 10 is a key regulator of tumorigenesis and metastasis and a novel serum marker in breast cancer
Source: Springer Nature journal article supplement (doi:10.1186/s13058-016-0785-2), 2017-02-08
Supplement: MOESM2 [file 12053010]

**Table S2. The clinicopathological characteristics of 100 breast cancer patients for serological detection of TMSB10 were presented.**

| Parameters         |                | Number of cases | Percentage (%) |
|--------------------|----------------|-----------------|----------------|
| Gender             | Female         | 100             | 100.0          |
| Age (years)        | ≤50            | 35              | 35.0           |
|                    | >50            | 65              | 65.0           |
| Pathological type  | IDC            | 92              | 92.0           |
|                    | Other          | 8               | 8.0            |
| T classification   | T <sub>1</sub> | 33              | 33.0           |
|                    | T <sub>2</sub> | 36              | 46.0           |
|                    | T <sub>3</sub> | 24              | 24.0           |
|                    | T <sub>4</sub> | 7               | 7.0            |
| N classification   | N <sub>0</sub> | 29              | 29.0           |
|                    | N <sub>1</sub> | 33              | 33.0           |
|                    | N <sub>2</sub> | 24              | 24.0           |
|                    | N <sub>3</sub> | 14              | 14.0           |
| M classification   | M <sub>0</sub> | 95              | 95.0           |
|                    | M <sub>1</sub> | 5               | 5.0            |
| Clinical stage     | I              | 28              | 28.0           |
|                    | II             | 34              | 34.0           |
|                    | III            | 33              | 33.0           |
|                    | IV             | 5               | 5.0            |
| Pathological grade | G <sub>1</sub> | 27              | 27.0           |
|                    | G <sub>2</sub> | 35              | 35.0           |
|                    | G <sub>3</sub> | 38              | 38.0           |

**Abbreviation:** Invasive ductal carcinoma (IDC).
