# Supplementary material for: Thymosin beta 10 is a key regulator of tumorigenesis and metastasis and a novel serum marker in breast cancer
Source: Springer Nature journal article supplement (doi:10.1186/s13058-016-0785-2), 2017-02-08
Supplement: MOESM4 [file 12053010]

**Table S6. The clinicopathological characteristics of patients in Kaplan-Meier Plotter with breast cancer for analysis were presented.**

| Parameters                              |                           | Number of cases |
|-----------------------------------------|---------------------------|-----------------|
| ER status<br>(n = 3779)                 | Positive                  | 2565            |
|                                         | Negative                  | 1214            |
| PR status<br>(n = 1982)                 | Positive                  | 954             |
|                                         | Negative                  | 1028            |
| HER2 status<br>(n = 1872)               | Positive                  | 416             |
|                                         | Negative                  | 1456            |
| Lymph node status<br>(n = 3720)         | Positive                  | 1459            |
|                                         | Negative                  | 2259            |
| Grade<br>(n = 2545)                     | I                         | 378             |
|                                         | II                        | 1077            |
|                                         | III                       | 1090            |
| Intrinsic subtype<br>(n = 5143)         | Basal                     | 879             |
|                                         | Luminal A                 | 2504            |
|                                         | Luminal B                 | 1425            |
|                                         | HER2+                     | 335             |
| TP53 status<br>(n = 595)                | Mutated                   | 232             |
|                                         | Wild type                 | 363             |
| Pietenpol subtype<br>(n = 1246)         | Basal-like 1              | 239             |
|                                         | Basal-like 2              | 97              |
|                                         | Immunomodulatory          | 290             |
|                                         | Mesenchymal               | 229             |
|                                         | Mesenchymal stem-like     | 115             |
|                                         | Luminal androgen receptor | 276             |
| With systemically therapy<br>(n = 3899) | Include                   | 2884            |
|                                         | Exclude                   | 1015            |
| With endocrine therapy<br>(n = 3099)    | Include                   | 1381            |
|                                         | Exclude                   | 1718            |

|                   |                |      |
|-------------------|----------------|------|
|                   | Tamoxifen only | 1043 |
| With Chemotherapy | Include        | 678  |
| (n = 3268)        | Exclude        | 2590 |

---

**Abbreviation:** Estrogen receptor (ER), Progesterone receptor (PR), Human epidermal growth factor receptor 2 (HER2).
