# Supplementary material for: Thymosin beta 10 is a key regulator of tumorigenesis and metastasis and a novel serum marker in breast cancer
Source: Springer Nature journal article supplement (doi:10.1186/s13058-016-0785-2), 2017-02-08
Supplement: MOESM5 [file 12053010]

**Table S7. The clinicopathological characteristics of 1097 patients in TCGA with breast cancer for analysis were presented.**

| Parameters        |                | Number of cases | Percentage (%) |
|-------------------|----------------|-----------------|----------------|
| Gender            | Female         | 1085            | 98.9           |
|                   | Male           | 12              | 1.1            |
| Age (years)       | ≤50            | 766             | 69.8           |
|                   | >50            | 331             | 30.2           |
| Pathological type | IDC            | 784             | 71.5           |
|                   | Other          | 312             | 28.4           |
|                   | NA             | 1               | 0.1            |
| T classification  | T <sub>1</sub> | 281             | 25.6           |
|                   | T <sub>2</sub> | 635             | 57.9           |
|                   | T <sub>3</sub> | 138             | 12.6           |
|                   | T <sub>4</sub> | 40              | 3.6            |
|                   | TX             | 3               | 0.3            |
|                   | N <sub>0</sub> | 516             | 47.0           |
| N classification  | N <sub>1</sub> | 364             | 33.2           |
|                   | N <sub>2</sub> | 120             | 10.9           |
|                   | N <sub>3</sub> | 77              | 7.0            |
|                   | NX             | 20              | 2.0            |
| M classification  | M <sub>0</sub> | 912             | 83.1           |
|                   | M <sub>1</sub> | 22              | 2.0            |
|                   | MX             | 163             | 14.9           |
| Clinical stage    | I              | 183             | 16.7           |
|                   | II             | 621             | 56.6           |
|                   | III            | 249             | 22.7           |
|                   | IV             | 20              | 1.8            |
|                   | NA             | 24              | 2.2            |
| Survival status   | Live           | 945             | 86.1           |

|                    |          |     |      |
|--------------------|----------|-----|------|
|                    | Dead     | 152 | 13.9 |
|                    | Negative | 755 | 68.8 |
| Relapse status     | Positive | 157 | 14.3 |
|                    | NA       | 185 | 16.9 |
|                    | Negative | 238 | 21.7 |
| IHC status of ER   | Positive | 808 | 73.7 |
|                    | NA       | 51  | 4.6  |
|                    | Negative | 344 | 31.4 |
| IHC status of PR   | Positive | 699 | 63.7 |
|                    | NA       | 54  | 4.9  |
|                    | Negative | 564 | 51.4 |
| IHC status of HER2 | Positive | 164 | 14.9 |
|                    | NA       | 369 | 33.6 |

---

**Abbreviation:** Invasive ductal carcinoma (IDC), Immunological Histological Chemistry (IHC), Estrogen receptor (ER), Progesterone receptor (PR), Human epidermal growth factor receptor 2 (HER2), Not Available information (NA).
