# Supplementary material for: Thymosin beta 10 is a key regulator of tumorigenesis and metastasis and a novel serum marker in breast cancer
Source: Springer Nature journal article supplement (doi:10.1186/s13058-016-0785-2), 2017-02-08
Supplement: MOESM6 [file 12053010]

**Table S8. A list of primers used in the reactions for real-time RT-PCR.**

| Gene name |         | Sequence                        |
|-----------|---------|---------------------------------|
| TMSB10    | forward | 5'-CTTATCGAAGCTGGCGATTT-3'      |
|           | reverse | 5'-AGTGGGAGCACCAGGATCT-3'       |
| CCND1     | forward | 5'-AACTACCTGGACCGCTTCCT-3'      |
|           | reverse | 5'-CCACTTGAGCTTG TTCACCA-3'     |
| CCNE1     | forward | 5'-TCTTTGTCAGGTGTGGGGA-3'       |
|           | reverse | 5'-GAAATGGCCAAAATCGACAG-3'      |
| CDK6      | forward | 5'-TGTCTG TTCGTGACACTGTGC-3'    |
|           | reverse | 5'-ATGCCGCTCTCCACCAT-3'         |
| CDK4      | forward | 5'-GTCGGCTTCAGAGTTTCC AC-3'     |
|           | reverse | 5'-TGCAGTCCACATATGCAACA-3'      |
| CDKN1A    | forward | 5'-GTCCACTGGGCCGAAGAG-3'        |
|           | reverse | 5'-TGCGTTCACAGGTGTTTCTG-3'      |
| CDKN1B    | forward | 5'-TTCATCAAGCAGT GATGTATCTGA-3' |
|           | reverse | 5'-AAGAAGCCTGGCCTCAGAAG-3'      |
| GAPDH     | forward | 5'-AC CACAGTCCATGCCATCAC-3'     |
|           | reverse | 5'-TCCACCACCCTG TTGCTGTA-3'     |
