# Supplementary material for: Thymosin beta 10 is a key regulator of tumorigenesis and metastasis and a novel serum marker in breast cancer
Source: Springer Nature journal article supplement (doi:10.1186/s13058-016-0785-2), 2017-02-08
Supplement: MOESM9 [file 12053010]

**Table S4. Univariate and multivariate analysis of factors associated with overall survival in 253 breast cancer patients.**

| Characteristics                               | Univariate analysis |                 | Multivariate analysis |                 |
|-----------------------------------------------|---------------------|-----------------|-----------------------|-----------------|
|                                               | HR (95% CI)         | <i>P</i> values | HR (95% CI)           | <i>P</i> values |
| Age<br>(>50 years)                            | 1.27<br>(0.85-1.87) | 0.242           | 1.28<br>(0.84-1.93)   | 0.251           |
| Pathological type<br>(IDC)                    | 1.44<br>(0.83-2.48) | 0.196           | 0.82<br>(0.46-1.46)   | 0.496           |
| T stage<br>(T <sub>2</sub> – T <sub>4</sub> ) | 4.03<br>(2.49-6.52) | <0.001*         | 1.59<br>(0.89-2.84)   | 0.116           |
| N stage<br>(N <sub>1</sub> – N <sub>3</sub> ) | 6.06<br>(3.77-9.73) | <0.001*         | 2.60<br>(1.45-4.67)   | <0.001*         |
| M stage<br>(M <sub>1</sub> )                  | 5.88<br>(2.70-12.8) | <0.001*         | 1.76<br>(0.72-4.32)   | 0.214           |
| Clinical stage<br>(III – IV)                  | 6.03<br>(4.06-8.95) | <0.001*         | 1.50<br>(0.88-2.56)   | 0.136           |
| Histologic grade<br>(G <sub>3</sub> )         | 3.84<br>(2.59-5.68) | <0.001*         | 1.96<br>(1.24-3.09)   | 0.004           |
| Status of ER<br>(Positive)                    | 0.68<br>(0.46-1.00) | 0.048*          | 0.99<br>(0.63-1.57)   | 0.976           |
| Status of PR<br>(Positive)                    | 0.54<br>(0.37-0.80) | 0.002           | 0.69<br>(0.44-1.07)   | 0.096           |
| Status of HER2<br>(Positive)                  | 1.81<br>(1.22-2.70) | 0.003*          | 1.75<br>(1.15-2.68)   | 0.010           |
| Status of TMSB10<br>(High)                    | 4.62<br>(2.75-7.79) | <0.001*         | 2.10<br>(1.20-3.67)   | 0.010           |
| Status of Ki67<br>(High)                      | 2.36<br>(1.60-3.48) | <0.001*         | 1.67<br>(1.11-2.52)   | 0.014           |

HR, hazard ratio; CI, confidence interval.
