# Supplementary material for: Thymosin beta 10 is a key regulator of tumorigenesis and metastasis and a novel serum marker in breast cancer
Source: Springer Nature journal article supplement (doi:10.1186/s13058-016-0785-2), 2017-02-08
Supplement: MOESM10 [file 12053010]

**Table S5. Univariate and multivariate analysis of factors associated with distant metastasis-free survival in 246 breast cancer patients.**

| Characteristics                    | Univariate analysis |                 | Multivariate analysis |                 |
|------------------------------------|---------------------|-----------------|-----------------------|-----------------|
|                                    | HR (95% CI)         | <i>P</i> values | HR (95% CI)           | <i>P</i> values |
| Age                                | 1.00                |                 | 1.04                  |                 |
| (>50 years)                        | (0.69-1.44)         | 0.996           | (0.71-1.51)           | 0.861           |
| Pathological type                  | 1.54                |                 | 0.88                  |                 |
| (IDC)                              | (0.92-2.58)         | 0.100           | (0.51-1.52)           | 0.657           |
| T stage                            | 3.37                |                 | 1.72                  |                 |
| (T <sub>2</sub> – T <sub>4</sub> ) | (2.21-5.14)         | <0.001*         | (1.05-2.81)           | 0.032*          |
| N stage                            | 4.22                |                 | 2.07                  |                 |
| (N <sub>1</sub> – N <sub>3</sub> ) | (2.83-6.30)         | <0.001*         | (1.27-3.39)           | 0.004*          |
| M stage                            | -                   | -               | -                     | -               |
| (M <sub>1</sub> )                  | -                   | -               | -                     | -               |
| Clinical stage                     | 4.50                |                 | 1.34                  |                 |
| (III – IV)                         | (3.05-6.63)         | <0.001*         | (0.82-2.21)           | 0.248           |
| Histologic grade                   | 1.73                |                 | 1.73                  |                 |
| (G <sub>3</sub> )                  | (1.14-2.64)         | 0.011*          | (1.14-2.64)           | 0.011*          |
| Status of ER                       | 0.74                |                 | 1.12                  |                 |
| (Positive)                         | (0.51-1.06)         | 0.102           | (0.73-1.72)           | 0.591           |
| Status of PR                       | 0.49                |                 | 0.59                  |                 |
| (Positive)                         | (0.34-0.71)         | <0.001*         | (0.39-0.91)           | 0.016*          |
| Status of HER2                     | 1.80                |                 | 1.72                  |                 |
| (Positive)                         | (1.23-2.62)         | 0.002*          | (1.15-2.55)           | 0.008*          |
| Status of TMSB10                   | 3.89                |                 | 2.07                  |                 |
| (High)                             | (2.48-6.11)         | <0.001*         | (1.27-3.35)           | 0.003*          |
| Status of Ki67                     | 2.06                |                 | 1.47                  |                 |
| (High)                             | (1.43-2.97)         | <0.001*         | (1.00-2.16)           | 0.053           |

HR, hazard ratio; CI, confidence interval.
